# Supplementary material for: Offspring production of ovarian organoids derived from spermatogonial stem cells by defined factors with chromatin reorganization
Source: PubMed Central journal article supplement — J Adv Res. 2021 Mar 17;33:81–98. doi: 10.1016/j.jare.2021.03.006 (PMC8463929; doi:10.1016/j.jare.2021.03.006), 2021-03-17
Supplement: mmc1.pdf [file mmc1.pdf]

1 **Supplementary data for**

2  
3 **Offspring production of ovarian organoids derived from spermatogonial**  
4 **stem cells by defined factors with chromatin reorganization**

5 Huacheng Luo<sup>1</sup>, Xiaoyong Li<sup>1</sup>, Geng G. Tian<sup>1</sup>, Dali Li, Changliang Hou, Xinbao Ding,  
6 Lin Hou, Qifeng Lyu, Yunze Yang, Austin J. Cooney, Wenhai Xie, Ji Xiong, Hu Wang,  
7 Xiaodong Zhao\*, Ji Wu\*

8  
9 <sup>1</sup>These authors contributed equally to this work.

10 Correspondence: [jiwu@sjtu.edu.cn](mailto:jiwu@sjtu.edu.cn) ; [xiaodongzhao@sjtu.edu.cn](mailto:xiaodongzhao@sjtu.edu.cn)

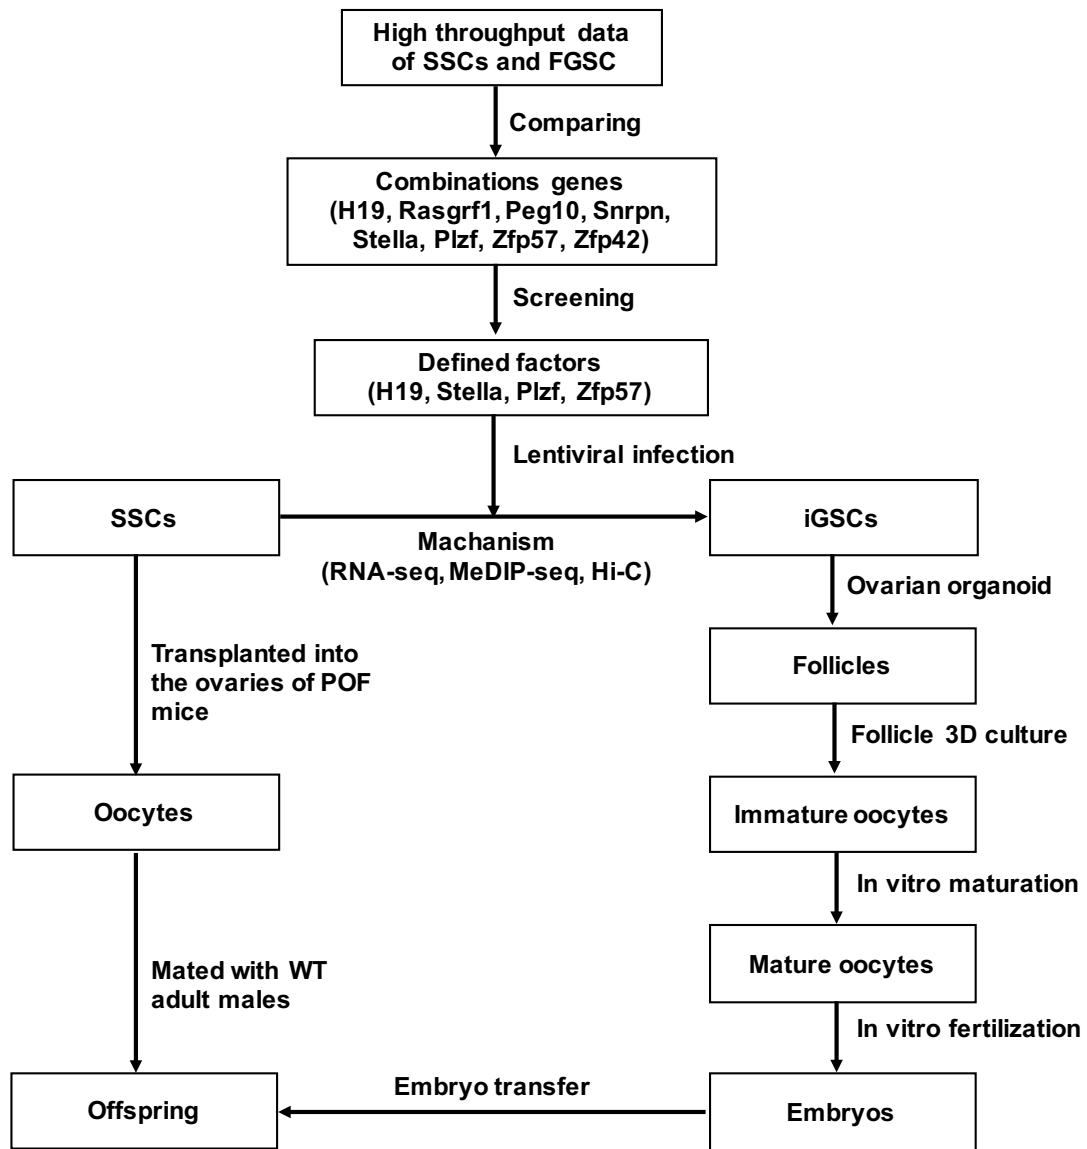

31

32

33 **Fig. S1.** Schematic representation of experimental protocol

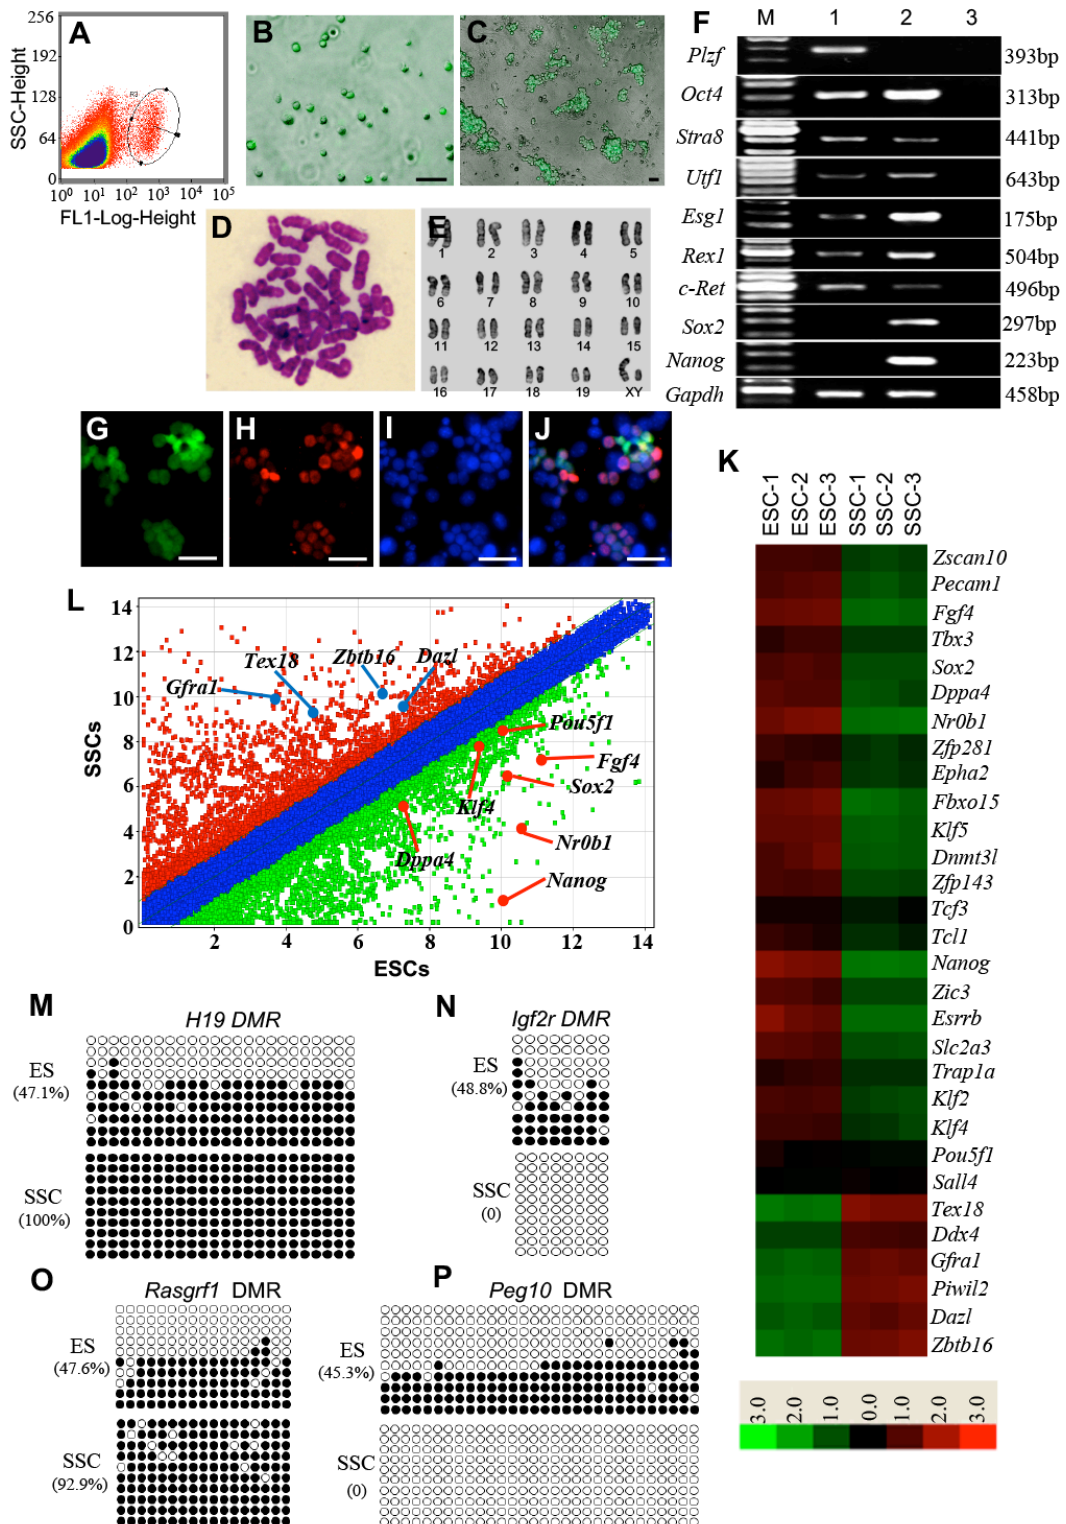

34

35

36 **Fig. S2.** Characterization of spermatogonial stem cells from neonatal mice. (A)

37 Representative example of spermatogonial stem cell (SSC) purification by

38 fluorescence-activated cell sorting (FACS). (B) Merge of bright field and fluorescence

39 images of SSCs after purification by FACS. (C) Merge of bright field and  
40 fluorescence microscopies of cultured SSCs. (D, E) Cytogenetic analysis by G-band  
41 staining showing that SSCs possessed a normal karyotype (40, XY). (F) Gene  
42 expression profiles of SSCs. M, 100 bp DNA marker; lane 1, SSCs; lane 2,  
43 Embryonic stem cells (ESCs); lane 3, mock-transcribed SSC RNA samples. (G-J)  
44 Cultured SSCs were positive for EGFP (G) and MVH (mouse vasa homologue,  
45 expressed exclusively in germ cells) (H) staining. Cells were counterstained with  
46 4',6-diamidino-2-phenylindole (DAPI) (I). (K, L) Global gene expression profiles of  
47 SSCs and ESCs. (K) Scatter plots of gene expression values in SSCs versus ESCs.  
48 Average expression levels of each gene (a dot on scatter plots) were calculated from  
49 three independent experiments. Genes whose expression level was at least two times  
50 greater in SSCs are shown in red, and genes whose expression level was at least two  
51 times greater in ESCs are shown in green. (L) Clustering analysis of some  
52 pluripotency-related genes and germ cell markers between SSCs and ESCs. (M-P)  
53 DMR methylation pattern of *H19* (M), *Igf2r* (N), *Rasgrf1* (O), and *Peg10* (P) regions.  
54 DNA methylation levels were analyzed by bisulfite genomic sequencing. Black  
55 circles represent methylated cytosine-guanine sites (CpGs), and white circles  
56 represent unmethylated CpGs. The percentage of methylated CpG sites is shown  
57 beside the map. Scale bars: 50  $\mu\text{m}$  (B, C), 30  $\mu\text{m}$  (G-J).

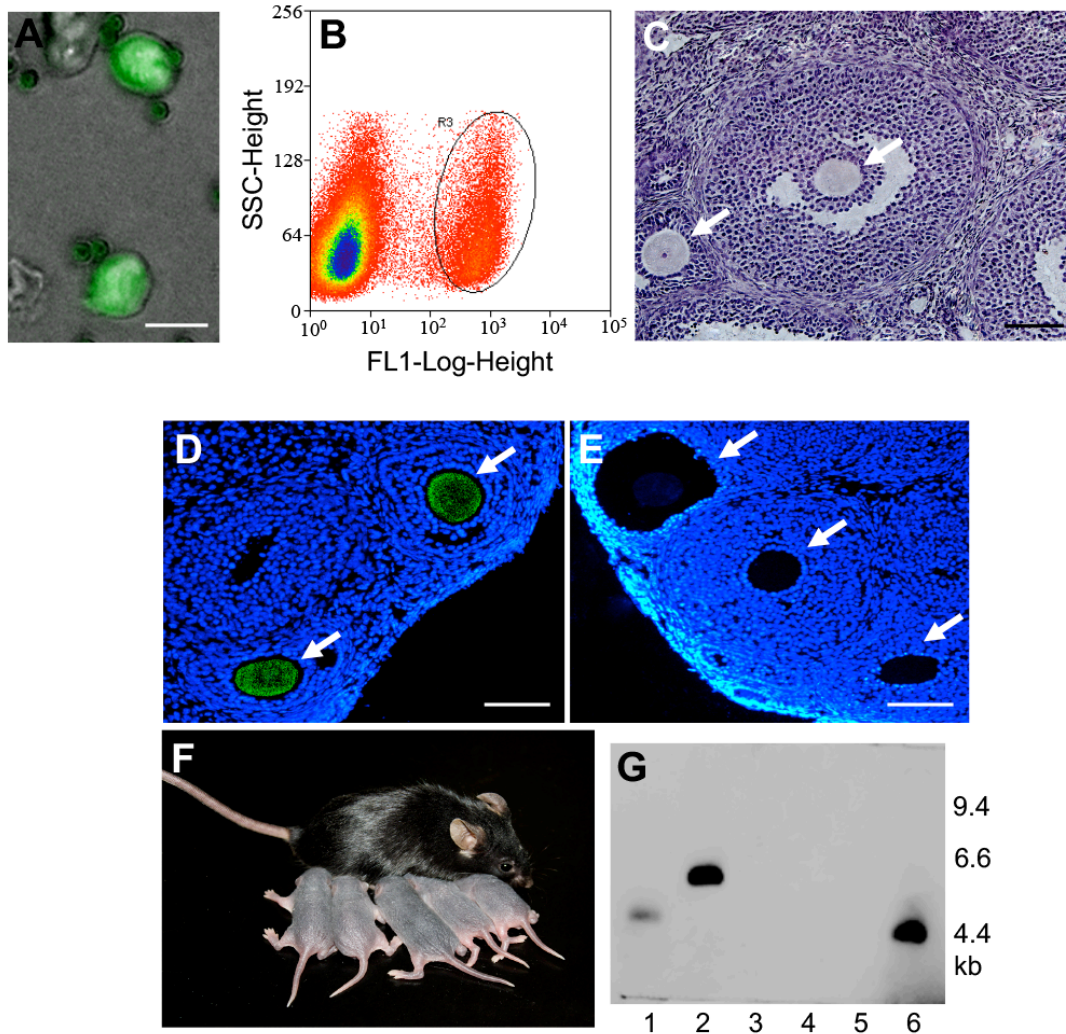

58

59 **Fig. S3.** Offspring derived from female germline stem cells. (A) Example of female  
 60 germ cells isolated by magnetic activated cell sorting (MACS) with an anti-fragilis  
 61 antibody. (B) Representative examples of female germline stem cell (FGSC)  
 62 purification by FACS. (C) Representative morphology of ovaries from recipients of  
 63 FGSC transplantation. (D) GFP-positive (green, arrows) oocytes in recipient ovaries  
 64 at 6–8 weeks after transplantation of Pou5f1/GFP transgenic FGSCs. (E) Oocytes  
 65 (arrows) in a wild-type ovary did not show a GFP signal. (F) Example of offspring  
 66 from premature ovarian failure (POF) recipient mice transplanted with Pou5f1/GFP  
 67 transgenic FGSCs. (G) Example of Southern blotting (see above). Lanes 1, 2, and 6,  
 68 transgenic mice; lanes 3–5, wild-type mice. Scale bars, 10 $\mu$ m (A) and 100  $\mu$ m (C-E).

69

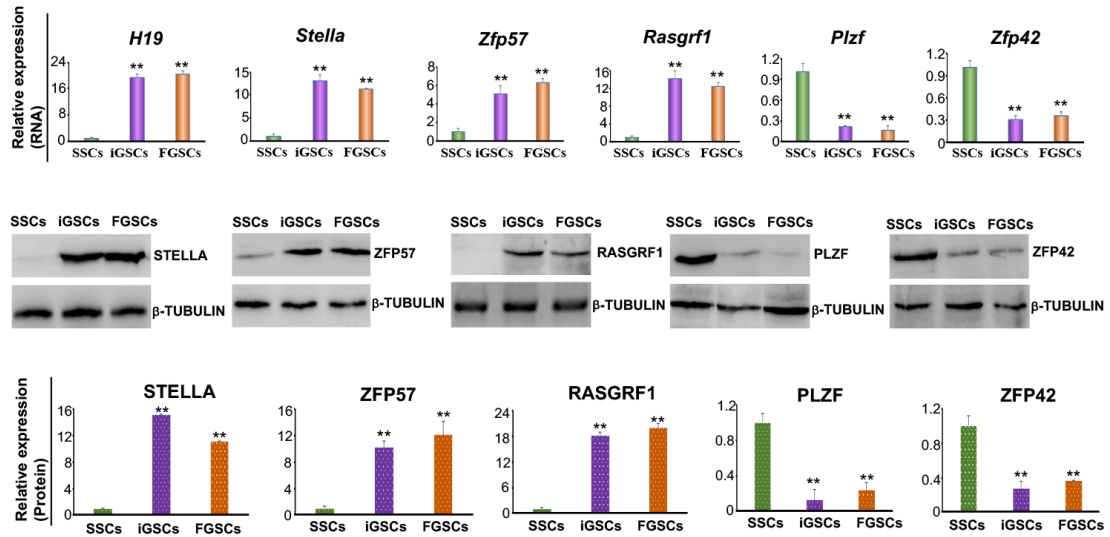

70

71 **Fig. S4.** Effects of specific gene expression levels examined by qRT-PCR and western

72 blot analyses.

73

74

75

76

77

78

79

80

81

82

83

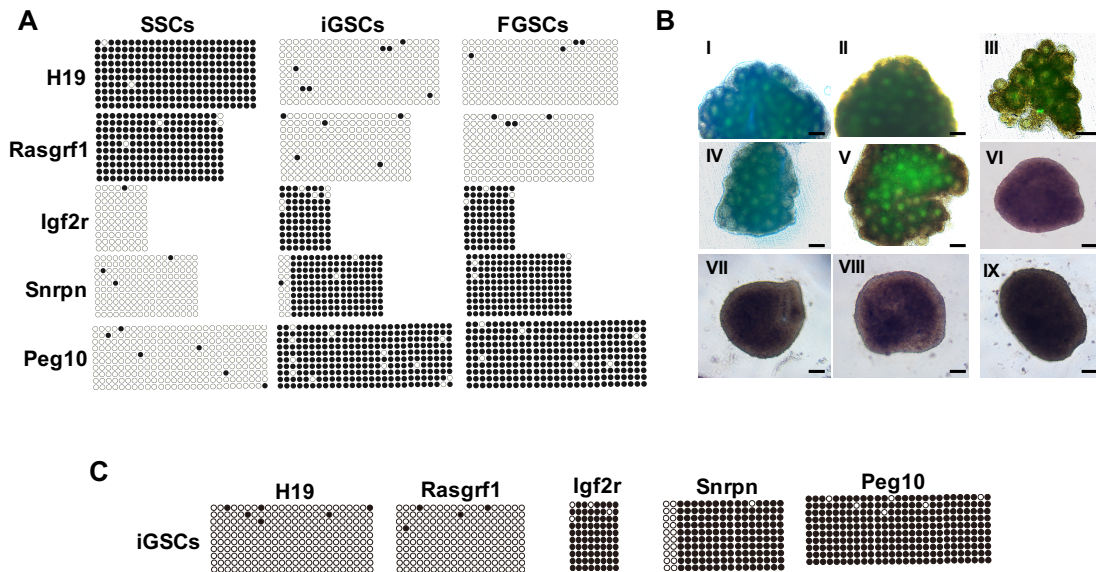

84

85

86 **Fig. S5.** Screening the critical imprinted genes and transcription factor genes required  
87 for SSC conversion. **(A)** Methylation analysis at paternally imprinted loci (*H19* and  
88 *Rasgrf1*) and maternally imprinted loci (*Igf2r*, *Snrpn*, and *Peg10*) in SSCs, iGSCs  
89 (induced by 6Gs, *Stella*, *H19*, *Zfp57*, *Rasgrf1*, *Plzf*, and *Zfp42*), and FGSCs. **(B)**  
90 Representative merged bright field and fluorescence images of ovarian organoids. I,  
91 Ovarian organoids formed by FGSCs co-cultured with somatic cells of gonads. II,  
92 Ovarian organoids formed by iGSCs induced by 6Gs co-cultured with somatic cells of  
93 gonads. III, Withdrawal of *Rasgrf1* from 6Gs, and ovarian organoids formed by  
94 iGSCs induced by remaining in 5Gs (*Stella*, *H19*, *Zfp57*, *Plzf*, and *Zfp42*) co-cultured  
95 with somatic cells of gonads. IV, Withdrawal of *Zfp42* from 5Gs, and ovarian  
96 organoids formed by iGSCs induced by remaining in 4Gs (*Stella*, *H19*, *Zfp57*, and  
97 *Plzf*) co-cultured with somatic cells of gonads. V–VIII, Removal of *Stella* (V), *H19*  
98 (VI), *Zfp57* (VII), or *Plzf* (VIII) from 4Gs failed to form ovarian organoids. **(C)**  
99 Methylation analysis at paternally imprinted loci (*H19* and *Rasgrf1*) and maternally  
100 imprinted loci (*Igf2r*, *Snrpn* and *Peg10*) in iGSCs induced by 4Gs. Scale bars: 100  
101  $\mu\text{m}$ .

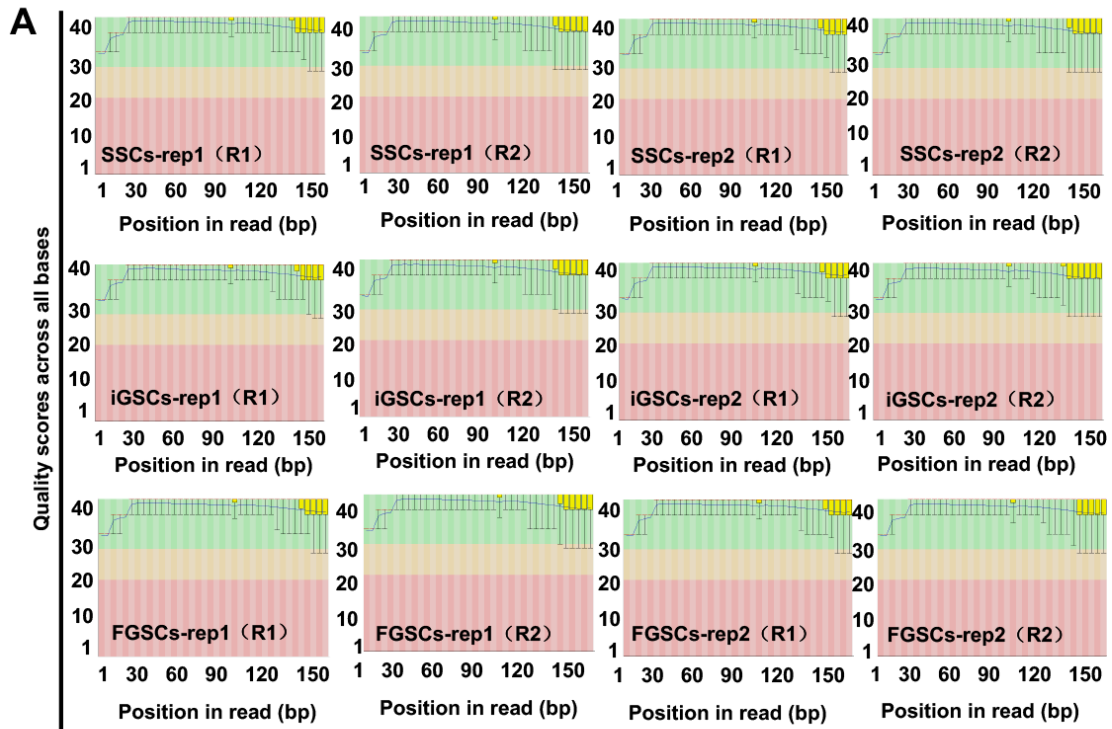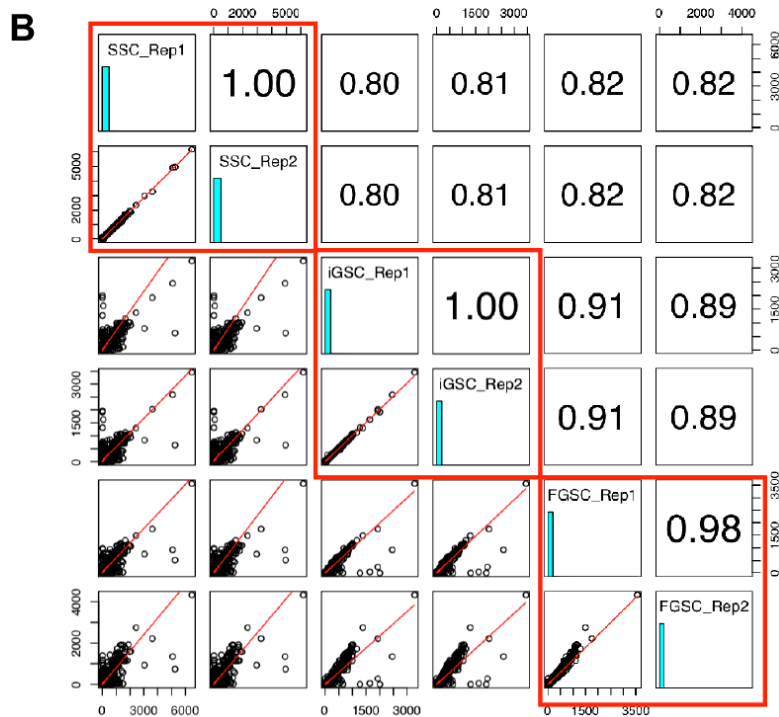

102

103 **Fig. S6.** Validate RNA-Seq data. (A) Fast-QC data showing the position-specific  
 104 sequencing quality in each replicated sample of SSCs, iGSCs, and FGSCs. (B)  
 105 Correlation plots of each replicated sample of SSCs, iGSCs, and FGSCs.



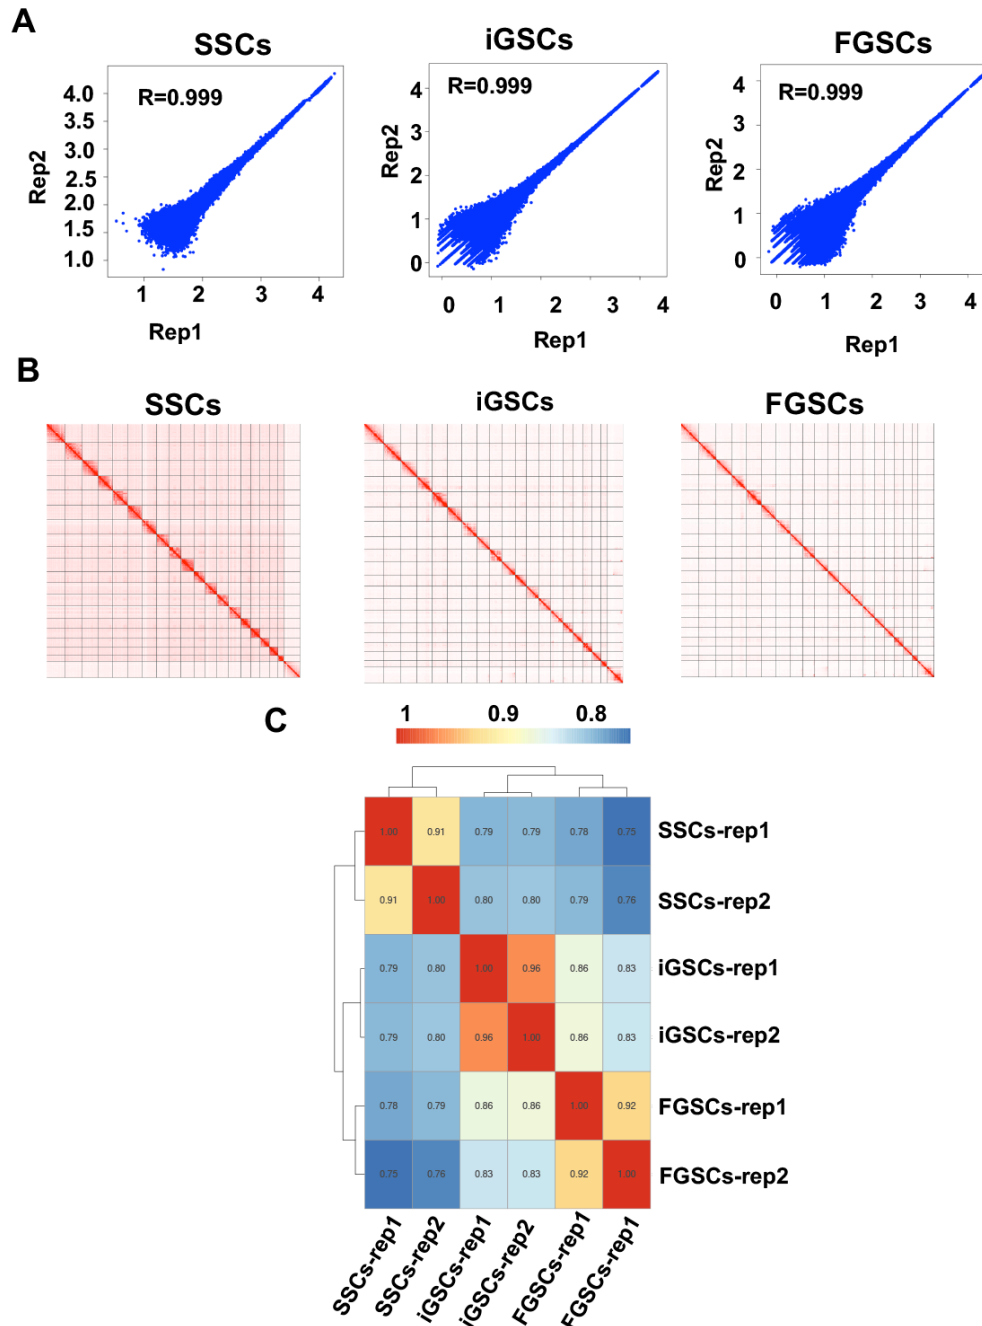

106

107 **Fig. S7.** Validate Hi-C data and overview of whole genome interaction frequency heat

108 maps in SSCs, iGSCs, and FGSCs. (A) Correlation between Hi-C replicates of SSCs,

109 iGSCs, and FGSCs according to the normalized interaction frequency at a 400kb

110 resolution. R indicates Pearson's correlation coefficient. (B) Hieratical clustering of

111 PC1 values for the A/B compartment status in SSCs, iGSCs, and FGSCs. (C) verview

112 of whole genome interaction frequency heat maps in SSCs, iGSCs, and FGSCs.

113

114

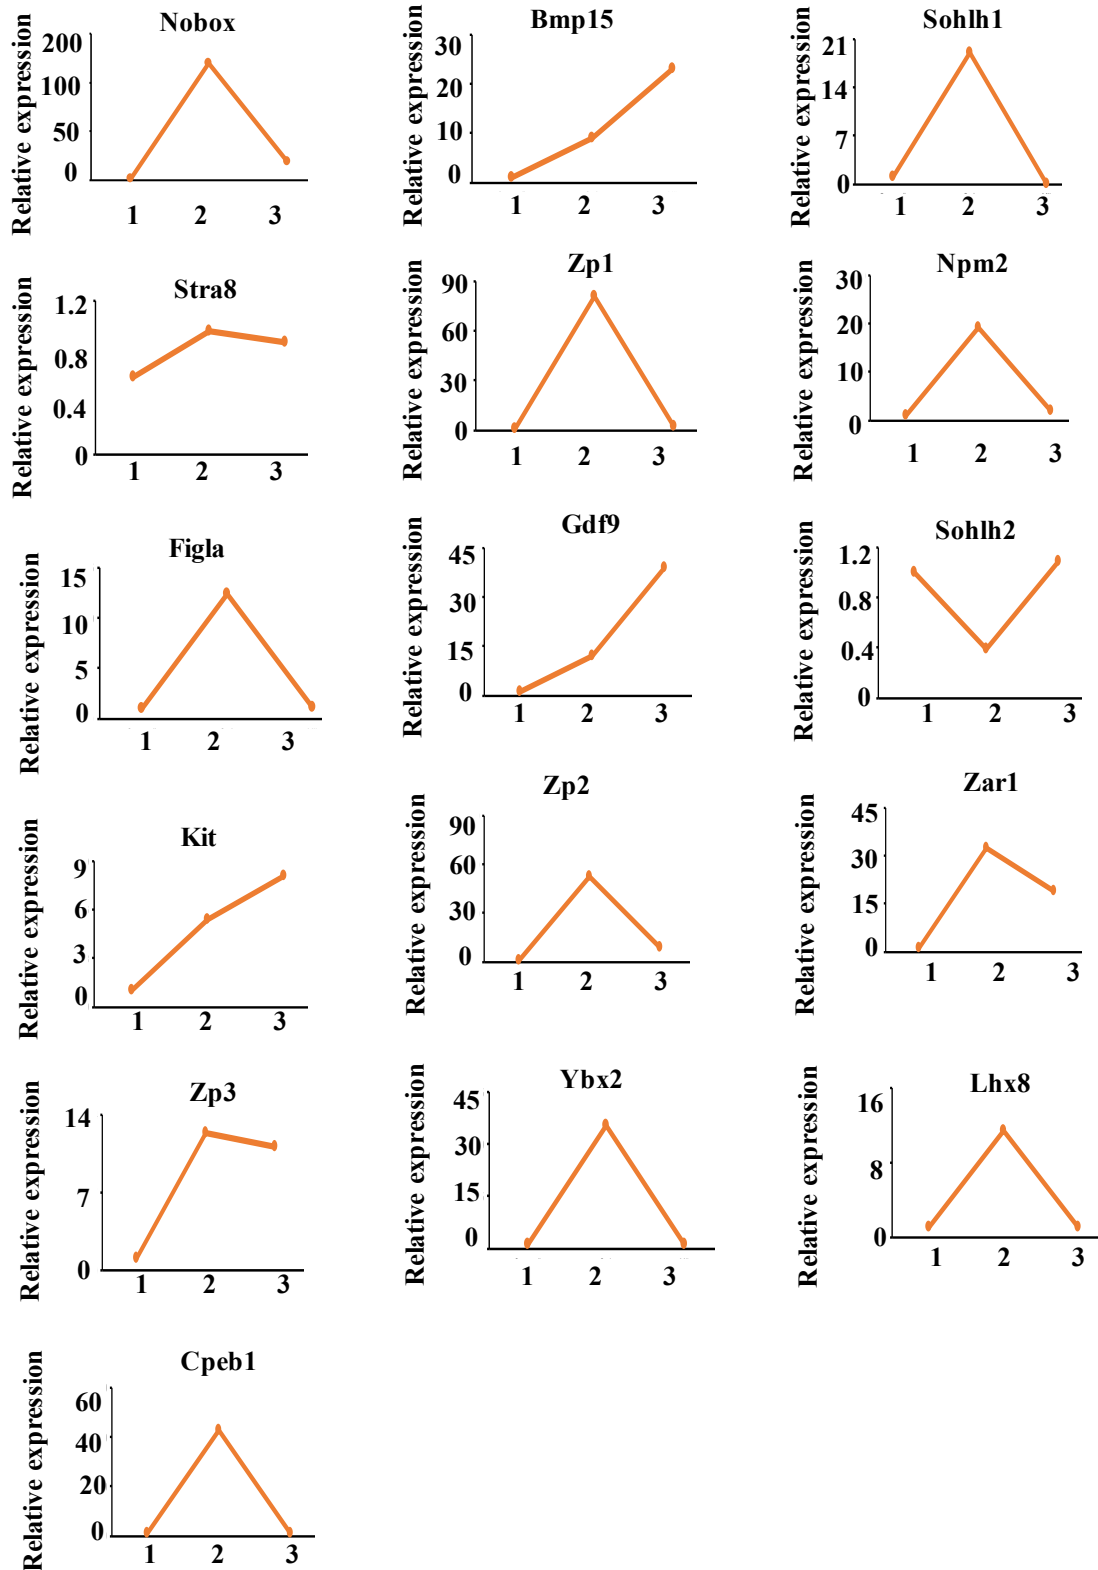

115

116 **Fig. S8.** Gene expression dynamics during oogenesis in vitro determined by qRT-PCR.

117 Relative mRNA expression of genes in oogenesis of iGSCs (red) and control (blue)

118 are shown. 1, GSCs, 2, immature oocytes, and 3, Mature oocytes.

119

120

121

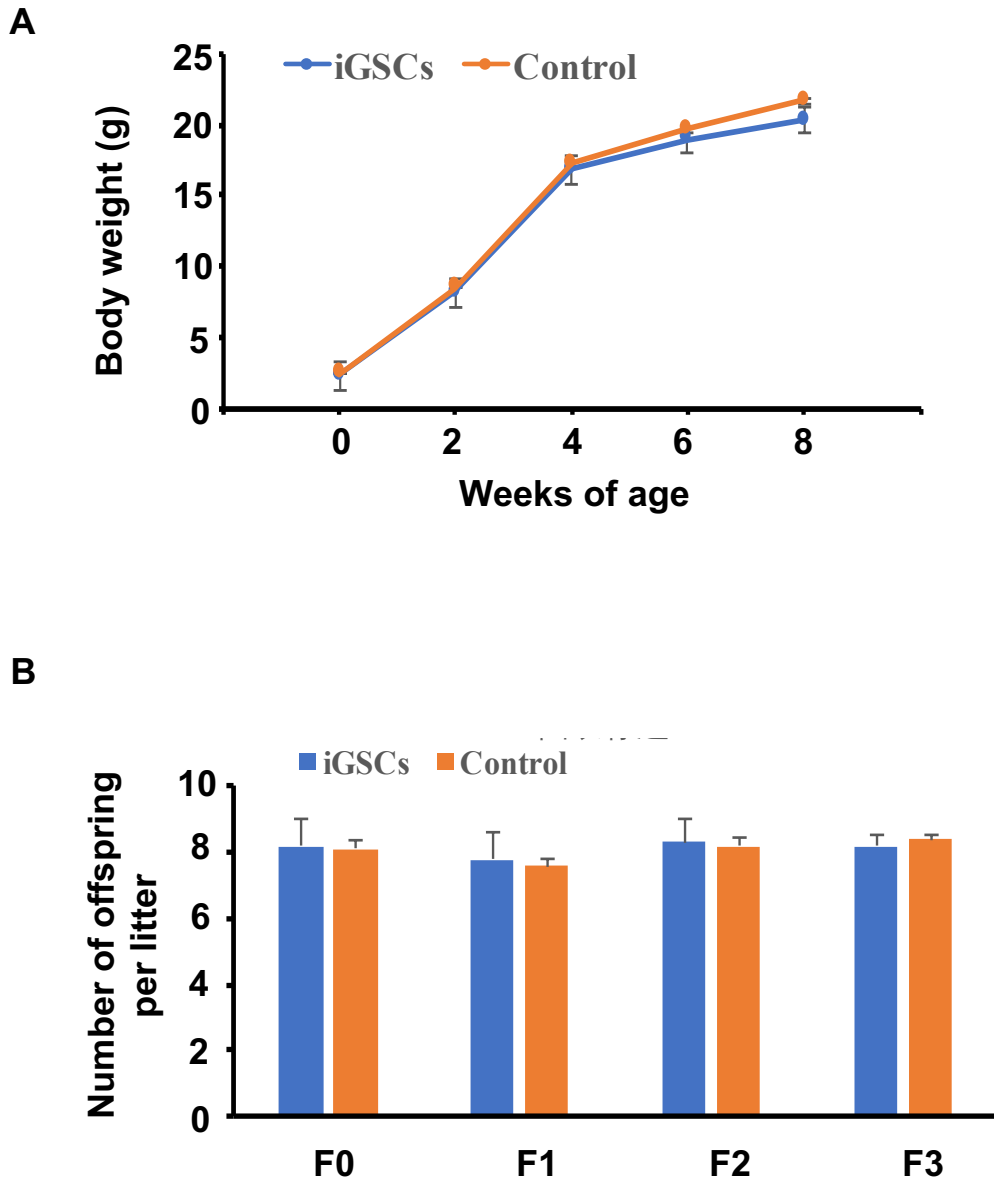

122

123 **Fig. S9.** Fertile offspring following in vitro production of functional oocytes from  
124 iGSCs. (A) The mean body weight of offspring from in vitro production of functional  
125 oocytes from iGSCs at postnatal week 0, 2, 4, 6, 8. (B) The mean number of F0, F1,  
126 F2, F3 generation offspring from in vitro production of functional oocytes from  
127 iGSCs per litter. F0 (offspring from in vitro offspring production of functional oocytes  
128 derived from iGSCs), F1(offspring produced by F0 generation), F2(offspring  
129 produced by F1 generation), F3 (offspring produced by F2 generation). Control, wild-  
130 type mice.

131

**Table S1. Details regarding the RT-PCR or qRT-PCR analysis of cells and tissues**

132

| Gene                                                                       | Product<br>Size(bp) | Primer Sequence (5'-3')                                 |
|----------------------------------------------------------------------------|---------------------|---------------------------------------------------------|
| <b>Primers for gene expression dynamic during oogenesis <i>in vivo</i></b> |                     |                                                         |
| Plzf                                                                       | 393                 | F: CACCAACCTTTCTTCTCCGGG<br>R: CCGTGTAGGCGTACTCCAGG     |
| Mvh                                                                        | 193                 | F: GCTTCATCAGATATTGGCGAGT<br>R: GCTTGGAAAACCCTCTGCTT    |
| Stra8                                                                      | 173                 | F:ACAACCTAAGGAAGGCAGTTTAC<br>R:GACCTCCTCTAAGCTGTTGGG    |
| Sycp3                                                                      | 206                 | F: AGCCAGTAACCAGAAAATTGAGC<br>R: CCACTGCTGCAACACATTCATA |
| Zp1                                                                        | 164                 | F: CCCTGAGATTGGGTCAGCG<br>R: AGAGCAGTTATTCACCTCAAACC    |
| Zp3                                                                        | 186                 | F: ATGGCGTCAAGCTATTCCTC<br>R: CGTGCCAAAAGGTCTCTACT      |
| Gapdh                                                                      | 123                 | F: AGGTCGGTGTGAACGGATTTG<br>R: TGTAGACCATGTAGTTGAGGTCA  |
| <b>Primers for gene expression dynamic in transplanted SSCs</b>            |                     |                                                         |
| H19                                                                        | 106                 | F: GAACAGAAGCATTCTAGGCTGG<br>R: TTCTAAGTGAATTACGGTGGGTG |
| Grb10                                                                      | 181                 | F: CCTGCCAAGCATGATGTCAAA<br>R: CCAGGCACCTCTCTAATCCCA    |

|         |     |                                                        |
|---------|-----|--------------------------------------------------------|
| Rasgrf1 | 71  | F: GCCAGAAGACTTGACAACGCT<br>R: TCAATCTACAGGGATGGTGGAAG |
| Zfp57   | 122 | F: ATGGCAGCTAGGAAACAGTCT<br>R: TGGTAAAGGGTCTTCTGTGTAGA |
| Igf2r   | 194 | F: GGGAAGCTGTTGACTCCAAAA<br>R: GCAGCCCATAGTGGTGTGAA    |
| Snrpn   | 156 | F: TGCTACGTGGGGAGAACTTG<br>R: CCTGGGGAATAGGTACACCTG    |
| Gtl2    | 71  | F: TCCTCACCTCCAATTTCCCCT<br>R: GAGCGAGAGCCGTTTCGATG    |
| Peg10   | 162 | F: TGCTTGCACAGAGCTACAGTC<br>R: AGTTTGGGATAGGGGCTGCT    |
| Stella  | 130 | F: GACCCAATGAAGGACCCTGAA<br>R: GCTTGACACCGGGGTTTAG     |
| Zfp42   | 161 | F: GGAGGAAATAGGTAGAGCGCA<br>R: AGTGAGGCGATCCTGCTTTC    |
| Plzf    | 150 | F: CTGCGGAAAACGGTTCCTG<br>R: GTGCCAGTATGGGTCTGTCT      |
| Nanos2  | 183 | F: CTGCAAGCACAATGGGGAGT<br>R: CGTCGGTAGAGAGACTGCTG     |
| Gapdh   | 123 | F: AGGTCGGTGTGAACGGATTTG<br>R: TGTAGACCATGTAGTTGAGGTCA |

**Primers for RT-PCR analysis of germ cell or germline stem cell markers**

|      |     |                           |
|------|-----|---------------------------|
| Dazl | 170 | F: ATGTCTGCCACAACCTTCTGAG |
|------|-----|---------------------------|

|          |     |                              |
|----------|-----|------------------------------|
|          |     | R: CTGATTTTCGGTTTCATCCATCCT  |
| Mvh      | 193 | F: GCTTCATCAGATATTGGCGAGT    |
|          |     | R: GCTTGGAAAACCCTCTGCTT      |
| Stella   | 386 | F: ATCGCCATGGAGGAACCATC      |
|          |     | R: AATGGCTCACTGTCCCGTTC      |
| Fragilis | 183 | F: GCCTATGCCTACTCCGTGAA      |
|          |     | R: AGTGTGAAGGTTTTGAGCGTT     |
| Oct4     | 313 | F: GCGTTTCTCTTTGGAAAGGTGTTTC |
|          |     | R: CTCGAACCACATCCTTCTCT      |
| Plzf     | 150 | F: CTGCGGAAAACGGTTCCTG       |
|          |     | R: GTGCCAGTATGGGTCTGTCT      |
| Gapdh    | 222 | F: CAGGAGAGTGTTTCCTCGTCC     |
|          |     | R: TTCCATTCTCGGCCTTGAC       |

**Primers for gene expression dynamic during oogenesis *in vitro***

|        |     |                           |
|--------|-----|---------------------------|
| Stella | 130 | F: GACCCAATGAAGGACCCTGAA  |
|        |     | R: GCTTGACACCGGGGTTTAG    |
| Bmp15  | 100 | F: TCCTTGCTGACGACCCTACAT  |
|        |     | R: TACCTCAGGGGATAGCCTTGG  |
| Sohlh1 | 181 | F: CGGGCCAATGAGGATTACAGA  |
|        |     | R: TCCTGCGTTCTCTCTCGCT    |
| Nobox  | 189 | F: ATGGAACCTACGGAGAAGCTC  |
|        |     | R: CTCAGAGGTCTTCGACAGTGG  |
| Zp1    | 164 | F: CCCTGAGATTGGGTCAGCG    |
|        |     | R: AGAGCAGTTATTACCTCAAACC |

|        |     |                                                        |
|--------|-----|--------------------------------------------------------|
| Npm2   | 162 | F: GTGACCGAAACCACAGCAAAA<br>R: CACACGGTTCACCTCCTCTT    |
| Stra8  | 173 | F: ACAACCTAAGGAAGGCAGTTTAC<br>R: GACCTCCTCTAAGCTGTTGGG |
| Gdf9   | 116 | F: TCTTAGTAGCCTTAGCTCTCAGG<br>R: TGTCAGTCCCATCTACAGGCA |
| Sohlh2 | 154 | F: GGGCAGGGCAGAGTAAATCTT<br>R: CAAACGAGTTAGCAGCCAAAAG  |
| Figla  | 238 | F: CCGCCATCTGTAGGCTCAAG<br>R: ACACAGCCGAGTATCTGTATGTA  |
| Zp2    | 111 | F: GTGGCAGAGGAAAGCATCTGT<br>R: GACTGAGGAAGGCTTACTGAGT  |
| Zar1   | 136 | F: TCGGTGCAGTGTTCACTCG<br>R: CTACGGTCTGCCAGGATCG       |
| Kit    | 90  | F: GCCACGTCTCAGCCATCTG<br>R: GTCGCCAGCTTCAACTATTA ACT  |
| Ybx2   | 102 | F: GGAGTTTGATGTCGTGGAAGG<br>R: CGTCGATTAGGGGCATAGCG    |
| Lhx8   | 159 | F: TCAGAGAGTGGTTACGGTCAC<br>R: CTGCTCGTCACATACCAGCTC   |
| Zp3    | 186 | F: ATGGCGTCAAGCTATTTCCCTC<br>R: CGTGCCAAAAGGTCTCTACT   |
| Cpeb1  | 229 | F: AAGGATTGCTGGGACAACCAA<br>R: GGCCACGGGGAGATTCTTG     |

|       |     |                                                        |
|-------|-----|--------------------------------------------------------|
| Gapdh | 123 | F: AGGTCGGTGTGAACGGATTTG<br>R: TGTAGACCATGTAGTTGAGGTCA |
|-------|-----|--------------------------------------------------------|

**Primers for gene expression profiles of SSCs**

|       |     |                                                            |
|-------|-----|------------------------------------------------------------|
| Gapdh | 458 | F: GTCCCGTAGACAAAATGGTGA<br>R: TGCATTGCTGACAATCTTGAG       |
| Oct4  | 313 | F: GGC GTTCTCTTTGGAAAGGTGTTC<br>R: CTCGAACACATCCTTCTCT     |
| Rex-1 | 504 | F: CACCATCCGGGATGAAAGTGAGAT<br>R: ACCAGAAAATGTCGCTTTAGTTTC |
| Esg-1 | 175 | F: GCCGTGCGTGGTGGATAAGC<br>R: GCCAAACAGATATTCAGCACCAGC     |
| Stra8 | 441 | F: TCACAGCCTCAAAGTGGCAGG<br>R: GCAACAGAGTGGAGGAGGAGT       |
| Utf1  | 643 | F: GATGTCCCGGTGACTACGTCT<br>R: TCGGGGAGGATTCGAAGGTAT       |
| c-Ret | 496 | F: TGGAAGCAGGAGCCAGACA<br>R: TGCTCTAATCCGCTTCTCCTG         |
| Sox-2 | 297 | F: TAGAGCTAGACTCCGGGCGATGA<br>R: TTGCCTTAAACAAGACCACGAAA   |
| Nanog | 223 | F: CAGGAGTTTGAGGGTAGCTC<br>R: CGGTTTCATCATGGTACAGTC        |

**Primers for effects of specific gene expression levels examined by qRT-PCR**

|     |     |                                                         |
|-----|-----|---------------------------------------------------------|
| H19 | 106 | F: GAACAGAAGCATTCTAGGCTGG<br>R: TTCTAAGTGAATTACGGTGGGTG |
|-----|-----|---------------------------------------------------------|



|         |     |                                                        |
|---------|-----|--------------------------------------------------------|
| Stella  | 130 | F: GACCCAATGAAGGACCCTGAA<br>R: GCTTGACACCGGGGTTTAG     |
| Zfp57   | 122 | F: ATGGCAGCTAGGAAACAGTCT<br>R: TGGTAAAGGGTCTTCTGTGTAGA |
| Rasgrf1 | 71  | F: GCCAGAAGACTTGACAACGCT<br>R: TCAATCTACAGGGATGGTGGAAG |
| Plzf    | 150 | F: CTGCGGAAAACGGTTCCTG<br>R: GTGCCAGTATGGGTCTGTCT      |
| Zfp42   | 161 | F: GGAGGAAATAGGTAGAGCGCA<br>R: AGTGAGGCGATCCTGCTTTC    |
| Gapdh   | 123 | F: AGGTCGGTGTGAACGGATTTG<br>R: TGTAGACCATGTAGTTGAGGTCA |

---

133 F, forward primer; R, reverse primer

134

135

1  
2  
3

**Table S2. Number of valid Hi-C reads**

| Cell Type | RE   | Replicate | Total Reads | Unique Read pairs (%) | Valid HiC pairs (%) | Duplication          | Cis short-range contacts(<20kb)(%) | Cis long-range contacts(>20kb)(%) | Trans Contacts (%) |
|-----------|------|-----------|-------------|-----------------------|---------------------|----------------------|------------------------------------|-----------------------------------|--------------------|
|           |      |           |             |                       |                     | Remaining Read pairs |                                    |                                   |                    |
| SSCs      | Mbol | R1        | 358740361   | 192240210(53.6%)      | 67216789(18.7%)     | 60006537             | 46582509(7.8%)                     | 21665016(36.1%)                   | 33683271(56.1%)    |
|           | Mbol | R2        | 387705044   | 201493073(52.0%)      | 89231944(23.0%)     | 75753385             | 5161733(7.2%)                      | 27178344(35.9%)                   | 43413308(56.8%)    |
|           | Mbol | Comb      | 746445405   | 393733283(52.7%)      | 156448733(21.0%)    | 135759922            | 9819983(7.2%)                      | 48843360(36.0%)                   | 77096579(28.3%)    |
| iGSCs     | Mbol | R1        | 344949297   | 143578429(41.6%)      | 103008967(29.9%)    | 47297743             | 5533433(11.7%)                     | 28381393(60.0%)                   | 13382917(28.3%)    |
|           | Mbol | R2        | 359258923   | 152003521(42.3%)      | 108556313(30.2%)    | 48746196             | 5693933(11.7%)                     | 29242847(60.0%)                   | 13809416(28.3%)    |
|           | Mbol | Comb      | 704208220   | 295581950(42.0%)      | 211565280(30.0%)    | 96043939             | 11227366(11.7%)                    | 57624240(60.0%)                   | 27192333(28.3%)    |
| FGSCs     | Mbol | R1        | 352273659   | 155092100(44.0%)      | 94903762(27.0%)     | 46337591             | 6457272(13.9%)                     | 27845481(60.0%)                   | 12034838(26.0%)    |
|           | Mbol | R2        | 184015447   | 78861662(42.9%)       | 47072757(25.6%)     | 30656444             | 4232968(13.8%)                     | 18433037(60.1%)                   | 7990439(26.1%)     |
|           | Mbol | Comb      | 536289106   | 233953762(43.6%)      | 141976519(26.5%)    | 76994035             | 10690240(13.9%)                    | 46278518(60.1%)                   | 20025277(26.0%)    |

1

2

**Table S2. The DNA methylation analysis of offspring derived from iGSCs**

| Source of<br>offspring mice | Number of<br>selected offspring | The DNA methylation levels (%) |       |
|-----------------------------|---------------------------------|--------------------------------|-------|
|                             |                                 | H19                            | Peg10 |
| <b>Wide type</b>            | WT-1                            | 49.55                          | 48.51 |
|                             | WT-2                            | 50.77                          | 48.96 |
|                             | WT-3                            | 49.22                          | 49.03 |
| <b>iGSCs</b>                | I-1                             | 49.17                          | 51.13 |
|                             | I-2                             | 51.32                          | 48.54 |
|                             | I-3                             | 51.08                          | 49.16 |
|                             | I-4                             | 49.16                          | 51.83 |
|                             | I-5                             | 49.00                          | 48.77 |
|                             | I-6                             | 49.68                          | 50.98 |
|                             | I-7                             | 50.33                          | 50.75 |
|                             | I-8                             | 51.71                          | 49.66 |
|                             | I-9                             | 48.52                          | 49.53 |
|                             | I-10                            | 49.31                          | 49.19 |

3

4

5

6

7

8

9

10

11

12

13

1 **Table S4. Number of offspring following *in vitro* offspring production of functional oocytes**  
 2 **derived from iGSCs**

| Group               | Number of male<br>offspring | Number of female<br>offspring | Male to female<br>ratio |
|---------------------|-----------------------------|-------------------------------|-------------------------|
| 2 ♂ (F0) × 4 ♀ (WT) | 73                          | 78                            | 0.94                    |
| 2 ♂ (WT) × 4 ♀ (F0) | 73                          | 77                            | 0.95                    |
| 2 ♂ (F0) × 4 ♀ (F0) | 78                          | 71                            | 1.10                    |
| 2 ♂ (F1) × 4 ♀ (WT) | 73                          | 76                            | 0.96                    |
| 2 ♂ (WT) × 4 ♀ (F1) | 81                          | 78                            | 1.04                    |
| 2 ♂ (F1) × 4 ♀ (F1) | 77                          | 75                            | 1.03                    |
| 2 ♂ (F2) × 4 ♀ (WT) | 76                          | 74                            | 1.03                    |
| 2 ♂ (WT) × 4 ♀ (F2) | 71                          | 73                            | 0.97                    |
| 2 ♂ (F2) × 4 ♀ (F2) | 75                          | 81                            | 0.93                    |
| 2 ♂ (F3) × 4 ♀ (WT) | 69                          | 76                            | 0.91                    |
| 2 ♂ (WT) × 4 ♀ (F3) | 72                          | 80                            | 0.90                    |
| 2 ♂ (F3) × 4 ♀ (F3) | 74                          | 69                            | 1.07                    |
| 2 ♂ (WT) × 4 ♀ (WT) | 73                          | 75                            | 0.97                    |

3 Notes: F0 (offspring from *in vitro* offspring production of functional oocytes derived from iGSCs),  
 4 F1(offspring produced by F0 generation), F2(offspring produced by F1 generation), F3 (offspring  
 5 produced by F2 generation)

6
